# Supplementary material
Source: PubMed Central journal article supplement (PMC4817381)
Supplement: ine-0004-0120-s01.pdf [file ine-0004-0120-s01.pdf]

**Prognostic value of the 24-hour neurologic examination in anterior circulation ischemic stroke:**

**Post-hoc analysis of two randomized controlled stroke trials.**

Srikant Rangaraju, MD<sup>1</sup>; Michael Frankel, MD<sup>1</sup>; Tudor G. Jovin, MD<sup>2</sup>

<sup>1</sup>Emory University, Atlanta; <sup>2</sup>University of Pittsburgh Medical Center, Pittsburgh

**SUPPLEMENT**

**eTable 1. Multivariable logistic regression: IMS3**

| <b>Variable</b>           | <b>p value</b> | <b>Odds<sup>#</sup><br/>Ratio</b> | <b>95% Confidence<br/>Interval</b> |      |
|---------------------------|----------------|-----------------------------------|------------------------------------|------|
| 24-hour NIHSS             | <0.001         | 0.75                              | 0.71                               | 0.79 |
| Age (years)               | <0.01          | 0.96                              | 0.94                               | 0.99 |
| Parenchymal<br>hemorrhage | 0.15           | 0.34                              | 0.08                               | 1.46 |
| Baseline NIHSS            | 0.41           | 0.97                              | 0.91                               | 1.04 |
| Atrial fibrillation       | 0.51           | 1.24                              | 0.65                               | 2.36 |
| Race (Black vs. others)   | 0.55           | 1.27                              | 0.58                               | 2.76 |
| Treatment arm (IV vs IA)  | 0.56           | 0.84                              | 0.46                               | 1.52 |
| Diabetes mellitus         | 0.61           | 0.83                              | 0.40                               | 1.71 |
| Time to randomization     | 0.69           | 1.00                              | 0.99                               | 1.01 |
| Baseline ASPECTS          | 0.73           | 0.98                              | 0.87                               | 1.10 |
| Hypertension              | 0.78           | 1.10                              | 0.55                               | 2.22 |

<sup>#</sup>Odds for a good functional outcome (mRS 0-2 at 3 months). Variables entered in this analysis were selected based on prior published literature that identified these as significant predictors of clinical outcome in stroke patients.

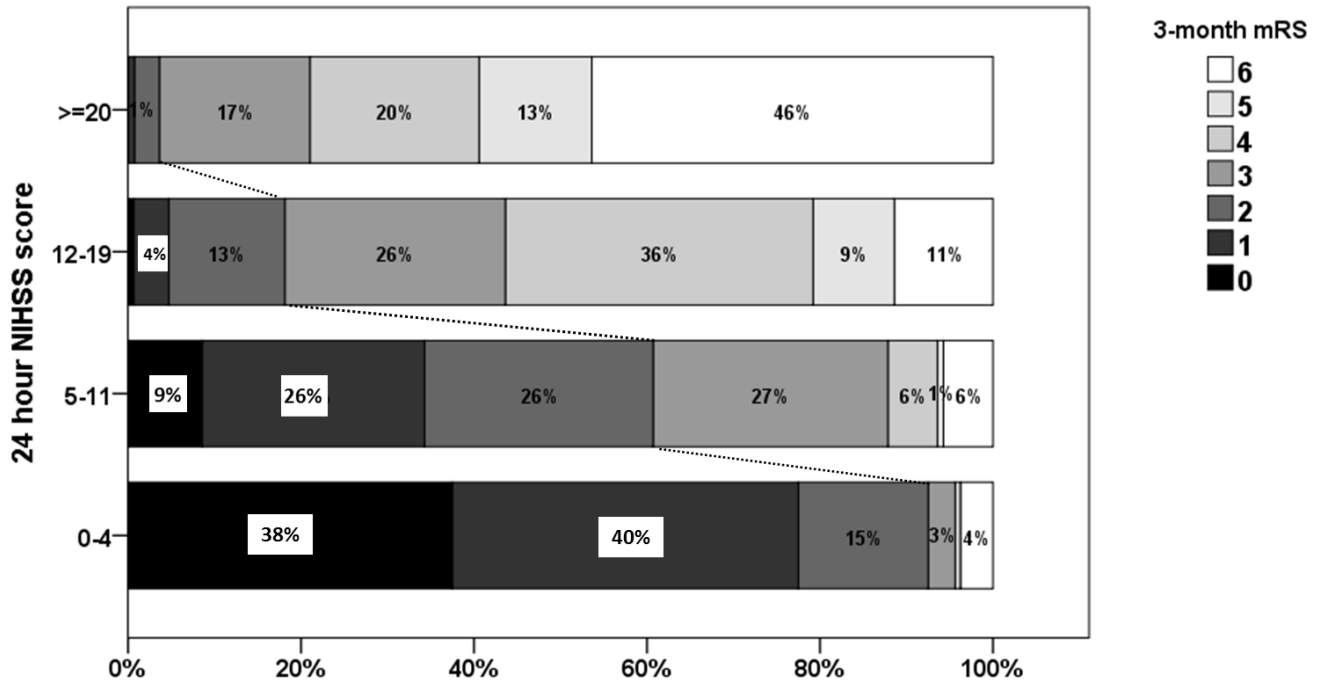

**eFigure 1.** 3-month clinical outcomes (mRS) observed in IMS3 across 24-hour NIHSS risk quartiles.
